# Supplementary material
Source: ML conference proceedings conference paper supplement (https://proceedings.neurips.cc/paper_files/paper/2021/hash/483101a6bc4e6c46a86222eb65fbcb6a-Abstract.html)
Supplement: Supplementary file [file 483101a6bc4e6c46a86222eb65fbcb6a-Supplemental.pdf]

## Notation

In the following denote  $\ell(\mathbf{w}, (\mathbf{x}, y)) \stackrel{\text{def}}{=} \frac{1}{2}(f_{\mathbf{w}}(\mathbf{x}) - y)^2$ . Unless stated otherwise, we work with vectorised quantities so  $\mathbf{W} \in \mathbb{R}^{dm}$  and therefore simply interchange  $\|\cdot\|_2$  with  $\|\cdot\|_F$ . We also use notation  $(\mathbf{W})_k$  so select  $k$ -th block of size  $d$ , that is  $(\mathbf{W})_k = [W_{(d-1)k+1}, \dots, W_{dk}]^\top$ . We use notation  $(a \vee b) \stackrel{\text{def}}{=} \max\{a, b\}$  and  $(a \wedge b) \stackrel{\text{def}}{=} \min\{a, b\}$  throughout the paper. Let  $(\mathbf{W}_t^{(i)})_t$  be the iterates of GD obtained from the data set with a resampled data point:

$$S^{(i)} \stackrel{\text{def}}{=} (z_1, \dots, z_{i-1}, \tilde{z}_i, z_{i+1}, \dots, z_n)$$

where  $\tilde{z}_i$  is an independent copy of  $z_i$ . Moreover, denote a remove-one version of  $S$  by

$$S^{\setminus i} \stackrel{\text{def}}{=} (z_1, \dots, z_{i-1}, z_{i+1}, \dots, z_n).$$

## A Smoothness and Curvature of the Empirical Risk (Proof of Lemma 1)

**Lemma 1 (restated).** Fix  $\mathbf{W}, \tilde{\mathbf{W}} \in \mathbb{R}^{d \times m}$ . Consider Assumption 1, Assumption 2, and assume that  $\mathcal{L}_S(\tilde{\mathbf{W}}) \leq C_0^2$ . Then, for any  $S$ ,

$$\begin{aligned} \lambda_{\max}(\nabla^2 \mathcal{L}_S(\mathbf{W})) &\leq \rho \quad \text{where} \quad \rho \stackrel{\text{def}}{=} C_x^2 \left( B_{\phi'}^2 + B_{\phi''} B_\phi + \frac{B_{\phi''} C_y}{\sqrt{m}} \right), \\ \min_{\alpha \in [0,1]} \lambda_{\min}(\nabla^2 \mathcal{L}_S(\tilde{\mathbf{W}} + \alpha(\mathbf{W} - \tilde{\mathbf{W}}))) &\geq -\frac{B_{\phi''}(B_{\phi'} C_x + C_0)}{\sqrt{m}} \cdot (1 \vee \|\mathbf{W} - \tilde{\mathbf{W}}\|_F). \end{aligned} \quad (10)$$

*Proof.* Vectorising allows the loss's Hessian to be denoted

$$\nabla^2 \ell(\mathbf{W}, z) = \nabla f_{\mathbf{W}}(\mathbf{x}) \nabla f_{\mathbf{W}}(\mathbf{x})^\top + \nabla^2 f_{\mathbf{W}}(\mathbf{x})(f_{\mathbf{W}}(\mathbf{x}) - y) \quad (11)$$

where

$$\nabla f_{\mathbf{W}}(\mathbf{x}) = \begin{pmatrix} u_1 \mathbf{x} \phi'(\langle (\mathbf{W})_1, \mathbf{x} \rangle) \\ u_2 \mathbf{x} \phi'(\langle (\mathbf{W})_2, \mathbf{x} \rangle) \\ \vdots \\ u_m \mathbf{x} \phi'(\langle (\mathbf{W})_m, \mathbf{x} \rangle) \end{pmatrix} \in \mathbb{R}^{dm}$$

and  $\nabla^2 f_{\mathbf{W}}(\mathbf{x}) \in \mathbb{R}^{dm \times dm}$  with

$$\nabla^2 f_{\mathbf{W}}(\mathbf{x}) = \begin{pmatrix} u_1 \mathbf{x} \mathbf{x}^\top \phi''(\langle (\mathbf{W})_1, \mathbf{x} \rangle) & 0 & 0 & \dots & 0 \\ 0 & u_2 \mathbf{x} \mathbf{x}^\top \phi''(\langle (\mathbf{W})_2, \mathbf{x} \rangle) & 0 & \dots & 0 \\ \vdots & \ddots & \ddots & \ddots & \vdots \\ 0 & 0 & 0 & \dots & u_m \mathbf{x} \mathbf{x}^\top \phi''(\langle (\mathbf{W})_m, \mathbf{x} \rangle) \end{pmatrix}$$

Note that we then immediately have with  $\mathbf{v} = (\mathbf{v}_1, \mathbf{v}_2, \dots, \mathbf{v}_m) \in \mathbb{R}^{dm}$  with  $\mathbf{v}_i \in \mathbb{R}^d$

$$\begin{aligned} \|\nabla^2 f_{\mathbf{W}}(\mathbf{x})\|_2 &= \max_{\mathbf{v}: \|\mathbf{v}\|_2 \leq 1} \sum_{j=1}^m u_j \langle \mathbf{v}_j, \mathbf{x} \rangle^2 \phi''(\langle (\mathbf{W})_j, \mathbf{x} \rangle) \\ &\leq \frac{1}{\sqrt{m}} \|\mathbf{x}\|_2^2 B_{\phi''} \max_{\mathbf{v}: \|\mathbf{v}\|_2 \leq 1} \sum_{j=1}^m \|\mathbf{v}_j\|_2^2 \\ &\leq \frac{C_x^2 B_{\phi''}}{\sqrt{m}}. \end{aligned} \quad (12)$$

We then see that the maximum Eigenvalue of the Hessian is upper bounded for any  $\mathbf{W} \in \mathbb{R}^{dm}$ , that is

$$\|\nabla^2 \ell(\mathbf{W}, z)\|_2 \leq \|\nabla f_{\mathbf{W}}(\mathbf{x})\|_2^2 + \|\nabla^2 f_{\mathbf{W}}(\mathbf{x})\|_2 |f_{\mathbf{W}}(\mathbf{x}) - y| \quad (13)$$

$$\leq C_x^2 B_{\phi'}^2 + \frac{C_x^2 B_{\phi''}}{\sqrt{m}} (\sqrt{m} B_\phi + C_y) \quad (14)$$

and therefore the objective is  $\rho$ -smooth with  $\rho = C_x^2(B_{\phi'}^2 + B_{\phi''}B_{\phi} + \frac{B_{\phi''}C_y}{\sqrt{m}})$ .

Let us now prove the lower bound (10). For some fixed  $\mathbf{W}, \widetilde{\mathbf{W}} \in \mathbb{R}^{d \times m}$  define

$$\mathbf{W}(\alpha) \stackrel{\text{def}}{=} \widetilde{\mathbf{W}} + \alpha(\mathbf{W} - \widetilde{\mathbf{W}}) \quad \alpha \in [0, 1].$$

Looking at the Hessian in (11), the first matrix is positive semi-definite, therefore

$$\begin{aligned} \lambda_{\min}(\nabla^2 \mathcal{L}_S(\mathbf{W}(\alpha))) &\geq -\left(\max_{i=1, \dots, n} \{\|\nabla^2 f_{\mathbf{W}(\alpha)}(\mathbf{x}_i)\|_2\}\right) \frac{1}{n} \sum_{i=1}^n |f_{\mathbf{W}(\alpha)}(\mathbf{x}_i) - y_i| \\ &\geq -\frac{C_x^2 B_{\phi''}}{\sqrt{m}} \cdot \frac{1}{n} \sum_{i=1}^n |f_{\mathbf{W}(\alpha)}(\mathbf{x}_i) - y_i| \end{aligned}$$

where we have used the upper bound on  $\|\nabla^2 f_{\mathbf{W}}(\mathbf{x}_i)\|_2$ . Adding and subtracting  $f_{\widetilde{\mathbf{W}}}(\mathbf{x}_i)$  inside the absolute value we then get

$$\begin{aligned} \frac{1}{n} \sum_{i=1}^n |f_{\mathbf{W}(\alpha)}(\mathbf{x}_i) - y_i| &\leq \frac{1}{n} \sum_{i=1}^n |f_{\mathbf{W}(\alpha)}(\mathbf{x}_i) - f_{\widetilde{\mathbf{W}}}(\mathbf{x}_i)| + \frac{1}{n} \sum_{i=1}^n |f_{\widetilde{\mathbf{W}}}(\mathbf{x}_i) - y_i| \\ &\leq B_{\phi'} C_x \|\mathbf{W}(\alpha) - \widetilde{\mathbf{W}}\|_2 + \sqrt{\mathcal{L}_S(\widetilde{\mathbf{W}})} \\ &\leq B_{\phi'} C_x \|\mathbf{W}(\alpha) - \widetilde{\mathbf{W}}\|_2 + \sqrt{\mathcal{L}_S(\mathbf{W}_0)} \\ &\leq (B_{\phi'} C_x + C_0)(1 \vee \|\mathbf{W}(\alpha) - \widetilde{\mathbf{W}}\|_2) \end{aligned}$$

where for the second term we have simply applied Cauchy-Schwarz inequality. For the first term, we used that for any  $\mathbf{W}, \widetilde{\mathbf{W}} \in \mathbb{R}^{dm}$  we see that

$$|f_{\mathbf{W}}(\mathbf{x}) - f_{\widetilde{\mathbf{W}}}(\mathbf{x})| \leq \frac{1}{\sqrt{m}} \sum_{i=1}^m |\phi(\langle (\mathbf{W})_i, \mathbf{x} \rangle) - \phi(\langle (\widetilde{\mathbf{W}})_i, \mathbf{x} \rangle)| \quad (15)$$

$$\begin{aligned} &\leq \frac{B_{\phi'}}{\sqrt{m}} \sum_{i=1}^m |\langle (\mathbf{W})_i - (\widetilde{\mathbf{W}})_i, \mathbf{x} \rangle| \\ &\leq C_x B_{\phi'} \|\mathbf{W} - \widetilde{\mathbf{W}}\|_2. \end{aligned} \quad (16)$$

Bringing everything together yields the desired lower bound

$$\begin{aligned} \lambda_{\min}(\nabla^2 \mathcal{L}_S(\mathbf{W}(\alpha))) &\geq -\frac{C_x^2}{\sqrt{m}} B_{\phi''} (B_{\phi'} C_x + C_0)(1 \vee \|\mathbf{W}(\alpha) - \widetilde{\mathbf{W}}\|_2) \\ &\geq -\frac{C_x^2}{\sqrt{m}} B_{\phi''} (B_{\phi'} C_x + C_0)(1 \vee \|\mathbf{W} - \widetilde{\mathbf{W}}\|_2). \end{aligned}$$

This holds for any  $\alpha \in [0, 1]$ , therefore, we took the minimum.  $\square$

## B Optimisation Error Bound (Proof of Lemma 2)

In this section we present the proof for the Optimisation Error term. We begin by quoting the result which we set to prove.

**Lemma 2 (restated).** *Consider Assumptions 1 and 2. Fix  $t > 0$ . If  $\eta \leq 1/(2\rho)$ , then*

$$\frac{1}{t} \sum_{j=0}^t \mathcal{L}_S(\mathbf{W}_j) \leq \min_{\mathbf{W} \in \mathbb{R}^{d \times m}} \left\{ \mathcal{L}_S(\mathbf{W}) + \frac{\|\mathbf{W} - \mathbf{W}_0\|_F^2}{\eta t} + \frac{\tilde{b} \|\mathbf{W} - \mathbf{W}_0\|_F^3}{\sqrt{m}} \right\} + \tilde{b} C_0 \cdot \frac{(\eta t)^{\frac{3}{2}}}{\sqrt{m}}$$

where  $\tilde{b} = C_x^2 B_{\phi''} (B_{\phi'} C_x + C_0)$ .

*Proof.* Using Lemma 1 as well as that  $\eta\rho \leq 1$  from the assumption within the theorem yields for  $t \geq 0$

$$\begin{aligned} \mathcal{L}_S(\mathbf{W}_{t+1}) &\leq \mathcal{L}_S(\mathbf{W}_t) - \eta \left(1 - \frac{\eta\rho}{2}\right) \|\nabla \mathcal{L}_S(\mathbf{W}_t)\|_2^2 \\ &\leq \mathcal{L}_S(\mathbf{W}_t) - \frac{\eta}{2} \|\nabla \mathcal{L}_S(\mathbf{W}_t)\|_2^2. \end{aligned}$$

Fix some  $\mathbf{W} \in \mathbb{R}^{dm}$ . We then use the following inequality which will be proven shortly:

$$\mathcal{L}_S(\mathbf{W}_t) \leq \mathcal{L}_S(\mathbf{W}) - \langle \mathbf{W} - \mathbf{W}_t, \nabla \mathcal{L}_S(\mathbf{W}_t) \rangle + \frac{\tilde{b}}{\sqrt{m}} (1 \vee \|\mathbf{W} - \mathbf{W}_t\|_2)^3 \quad (17)$$

Plugging in this inequality we then get

$$\mathcal{L}_S(\mathbf{W}_{t+1}) \leq \mathcal{L}_S(\mathbf{W}) - \langle \mathbf{W} - \mathbf{W}_t, \nabla \mathcal{L}_S(\mathbf{W}_t) \rangle - \frac{\eta}{2} \|\nabla \mathcal{L}_S(\mathbf{W}_t)\|_2^2 + \frac{\tilde{b}}{\sqrt{m}} (1 \vee \|\mathbf{W} - \mathbf{W}_t\|_2)^3 .$$

Note that we can rewrite

$$\begin{aligned} & - \langle \mathbf{W} - \mathbf{W}_t, \nabla \mathcal{L}_S(\mathbf{W}_t) \rangle - \frac{\eta}{2} \|\nabla \mathcal{L}_S(\mathbf{W}_t)\|_2^2 \\ &= \frac{1}{\eta} \langle \mathbf{W} - \mathbf{W}_t, \mathbf{W}_{t+1} - \mathbf{W}_t \rangle - \frac{1}{2\eta} \|\mathbf{W}_{t+1} - \mathbf{W}_t\|_2^2 \\ &= \frac{1}{\eta} (\|\mathbf{W} - \mathbf{W}_t\|_2^2 - \|\mathbf{W}_{t+1} - \mathbf{W}\|_2^2) \end{aligned}$$

where we used that for any vectors  $\mathbf{x}, \mathbf{y}, \mathbf{z}$ :  $2\langle \mathbf{x} - \mathbf{y}, \mathbf{x} - \mathbf{z} \rangle = \|\mathbf{x} - \mathbf{y}\|_2^2 + \|\mathbf{x} - \mathbf{z}\|_2^2 - \|\mathbf{y} - \mathbf{z}\|_2^2$  (which is easier to see if we relabel  $2\langle \mathbf{a}, \mathbf{b} \rangle = \|\mathbf{a}\|_2^2 + \|\mathbf{b}\|_2^2 - \|\mathbf{a} - \mathbf{b}\|_2^2$ ). Plugging in and summing up we get

$$\frac{1}{t} \sum_{s=0}^t \mathcal{L}_S(\mathbf{W}_t) \leq \mathcal{L}_S(\mathbf{W}) + \frac{\|\mathbf{W} - \mathbf{W}_0\|_2^2}{\eta t} + \frac{\tilde{b}}{\sqrt{m}} \cdot \frac{1}{t} \sum_{s=0}^t (1 \vee \|\mathbf{W} - \mathbf{W}_t\|_2)^3 .$$

Since the choice of  $\mathbf{W}$  was arbitrary, we can simply take the minimum.

**Proof of Eq. (17).** Let us now prove the key Eq. (17). Fix  $t \geq 0$ , and let us define the following functions for  $\alpha \in [0, 1]$

$$\begin{aligned} \mathbf{W}(\alpha) &\stackrel{\text{def}}{=} \mathbf{W}_t + \alpha(\mathbf{W} - \mathbf{W}_t) , \\ g(\alpha) &\stackrel{\text{def}}{=} \mathcal{L}_S(\mathbf{W}(\alpha)) + \frac{\tilde{b}}{\sqrt{m}} \cdot \frac{\alpha^2}{2} (1 \vee \|\mathbf{W} - \mathbf{W}_t\|_2)^3 . \end{aligned}$$

Note that computing the derivative we have

$$g''(\alpha) = (\mathbf{W} - \mathbf{W}_t)^\top \nabla^2 \mathcal{L}_S(\mathbf{W}(\alpha)) (\mathbf{W} - \mathbf{W}_t) + \frac{\tilde{b}}{\sqrt{m}} (1 \vee \|\mathbf{W} - \mathbf{W}_t\|_2)^3 .$$

On the other hand by Lemma 1 we have

$$\min_{\alpha \in [0, 1]} \lambda_{\min}(\nabla^2 \mathcal{L}_S(\mathbf{W}(\alpha))) \geq -\frac{\tilde{b}}{\sqrt{m}} (1 \vee \|\mathbf{W} - \mathbf{W}_t\|_2)$$

and we immediately have  $g''(\alpha) \geq 0$ , and thus,  $g(\cdot)$  is convex on  $[0, 1]$ . Inequality (17) then arises from  $g(1) - g(0) \geq g'(0)$ , in particular

$$\begin{aligned} g(1) - g(0) &= \mathcal{L}_S(\mathbf{W}) + \frac{\tilde{b}}{\sqrt{m}} (1 \vee \|\mathbf{W} - \mathbf{W}_t\|_2)^3 - \mathcal{L}_S(\mathbf{W}_t) \\ &\geq \langle \mathbf{W} - \mathbf{W}_t, \nabla \mathcal{L}_S(\mathbf{W}_t) \rangle \\ &= g'(0) \end{aligned}$$

as required. □

## C Generalisation Gap Bound (Proof of Theorem 1)

In this section we prove:

**Theorem 1 (restated).** Consider Assumptions 1 and 2. Fix  $t > 0$ . If  $\eta \leq 1/(2\rho)$  and

$$m \geq 144(\eta t)^2 C_x^4 C_0^2 B_{\phi'}^2 \left(4B_{\phi'} C_x \sqrt{\eta t} + \sqrt{2}\right)^2$$

$$\text{then } \mathbf{E} [\epsilon^{Gen}(\mathbf{W}_{t+1}) \mid \mathbf{W}_0, \mathbf{u}] \leq b \left(\frac{\eta}{n} + \frac{\eta^2 t}{n^2}\right) \sum_{j=0}^t \mathbf{E} [\mathcal{L}_S(\mathbf{W}_j) \mid \mathbf{W}_0, \mathbf{u}]$$

where  $b = 16e^3 C_x^{\frac{3}{2}} B_{\phi'}^2 (1 + C_x^{\frac{3}{2}} B_{\phi'}^2)$ .

To prove this result we use algorithmic stability arguments. Recall that we can write [Shalev-Shwartz and Ben-David, 2014, Chapter 13],

$$\mathbf{E} [\mathcal{L}(\mathbf{W}_{t+1}) - \mathcal{L}_S(\mathbf{W}_{t+1}) \mid \mathbf{W}_0, \mathbf{u}] = \frac{1}{n} \sum_{i=1}^n \mathbf{E} \left[ \ell(\mathbf{W}_{t+1}, \tilde{z}_i) - \ell(\mathbf{W}_{t+1}^{(i)}, \tilde{z}_i) \mid \mathbf{W}_0, \mathbf{u} \right].$$

The following lemma shown in Appendix C.1 then bounds the Generalisation error in terms of a notation of stability.

**Lemma 3 (restated).** Consider Assumptions 1 and 2. Then, for any  $t \geq 0$ ,

$$\begin{aligned} & \mathbf{E} [\mathcal{L}(\mathbf{W}_t) - \mathcal{L}_S(\mathbf{W}_t) \mid \mathbf{W}_0, \mathbf{u}] \\ & \leq B_{\phi'} \sqrt{C_x} \sqrt{\mathbf{E} [\mathcal{L}_S(\mathbf{W}_t) \mid \mathbf{W}_0, \mathbf{u}]} \sqrt{\frac{1}{n} \sum_{i=1}^n \mathbf{E} [\|\mathbf{W}_t - \mathbf{W}_t^{(i)}\|_{op}^2 \mid \mathbf{W}_0, \mathbf{u}]} \\ & + C_x B_{\phi'}^2 \cdot \frac{1}{n} \sum_{i=1}^n \mathbf{E} [\|\mathbf{W}_t - \mathbf{W}_t^{(i)}\|_{op}^2 \mid \mathbf{W}_0, \mathbf{u}] \end{aligned}$$

where  $\|\cdot\|_{op}$  denotes the spectral norm.

We note while the stability is only required on the spectral norm, our bound will be on the element wise  $L_2$ -norm i.e. Frobenius norm, which upper bounds the spectral norm. It is summarised within the following lemma shown in Appendix C.2.

**Lemma 4 (Bound on On-Average Parameter Stability).** Consider Assumptions 1 and 2. Fix  $t > 0$ . If  $\eta \leq 1/(2\rho)$ , then

$$\frac{1}{n} \sum_{i=1}^n \mathbf{E} [\|\mathbf{W}_{t+1} - \mathbf{W}_{t+1}^{(i)}\|_F^2 \mid \mathbf{W}_0, \mathbf{u}] \leq 8e \frac{\eta^2 t}{n^2} \left(\frac{1}{1-2\eta\epsilon}\right)^t \frac{1}{n} \sum_{i=1}^n \sum_{j=0}^t \mathbf{E} [\|\nabla \ell(\mathbf{W}_j, z_i)\|_2^2 \mid \mathbf{W}_0, \mathbf{u}]$$

where  $\epsilon = 2 \cdot \frac{C_x^2 \sqrt{C_0} B_{\phi'}^2}{\sqrt{m}} (4B_{\phi'} C_x \sqrt{\eta t} + \sqrt{2})$ .

Theorem 1 then arises by combining Lemma 3 and Lemma 4, and noting the following three points. Firstly, recall that

$$\begin{aligned} \frac{1}{n} \sum_{i=1}^n \|\nabla \ell(\mathbf{W}, z_i)\|_2^2 & \leq \left(\max_{i=1, \dots, n} \|\nabla f_{\mathbf{W}}(\mathbf{x}_i)\|_2\right)^2 \frac{1}{n} \sum_{i=1}^n (f_{\mathbf{W}}(\mathbf{x}_i) - y_i)^2 \\ & \leq 2C_x^2 B_{\phi'}^2 \mathcal{L}_S(\mathbf{W}). \end{aligned}$$

Secondly, note that we have  $\left(\frac{1}{1-2\eta\epsilon}\right)^t \leq \exp\left(\frac{2\eta t \epsilon}{1-2\eta t \epsilon}\right) \leq e^2$  when  $2\eta t \epsilon \leq 2/3$ . For this to occur we then require

$$\epsilon = 2 \cdot \frac{C_x^2 \sqrt{C_0} B_{\phi'}^2}{\sqrt{m}} \cdot (4B_{\phi'} C_x \sqrt{\eta t} + \sqrt{2}) \leq \frac{1}{3\eta t},$$

which is satisfied by scaling  $m$  sufficient large, in particular, as required within condition (7) within the statement of Theorem 1. This allows us to arrive at the bound on the  $L_2$ -stability

$$\frac{1}{n} \sum_{i=1}^n \mathbf{E} [\|\mathbf{W}_{t+1} - \mathbf{W}_{t+1}^{(i)}\|_F^2 \mid \mathbf{W}_0, \mathbf{u}] \leq \frac{\eta^2 t}{n^2} \cdot 16e^3 C_x^2 B_{\phi'}^2 \sum_{j=0}^t \mathbf{E} [\mathcal{L}_S(\mathbf{W}_j) \mid \mathbf{W}_0, \mathbf{u}].$$

Third and finally, note that we can bound

$$\begin{aligned}
& \sqrt{\mathbf{E}[\mathcal{L}_S(\mathbf{W}_{t+1}) \mid \mathbf{W}_0, \mathbf{u}]} \sqrt{\frac{\eta^2 t}{n^2} \sum_{j=0}^t \mathbf{E}[\mathcal{L}_S(\mathbf{W}_j) \mid \mathbf{W}_0, \mathbf{u}]} \\
&= \frac{\eta}{n} \sqrt{t \mathbf{E}[\mathcal{L}_S(\mathbf{W}_{t+1}) \mid \mathbf{W}_0, \mathbf{u}]} \sqrt{\sum_{j=0}^t \mathbf{E}[\mathcal{L}_S(\mathbf{W}_j) \mid \mathbf{W}_0, \mathbf{u}]} \\
&\leq \frac{\eta}{n} \sum_{j=0}^t \mathbf{E}[\mathcal{L}_S(\mathbf{W}_j) \mid \mathbf{W}_0, \mathbf{u}]
\end{aligned}$$

since  $\mathcal{L}_S(\mathbf{W}_{t+1}) \leq \frac{1}{t} \sum_{j=1}^t \mathcal{L}_S(\mathbf{W}_j)$ . This then results in

$$\begin{aligned}
& \mathbf{E}[\mathcal{L}(\mathbf{W}_{t+1}) - \mathcal{L}_S(\mathbf{W}_{t+1}) \mid \mathbf{W}_0, \mathbf{u}] \\
&\leq \left( \frac{\eta}{n} (4e^2 C_x^{3/2} B_{\phi'}^2) + \frac{\eta^2 t}{n^2} (16e^3 C_x^3 B_{\phi'}^4) \right) \sum_{j=0}^t \mathbf{E}[\mathcal{L}_S(\mathbf{W}_j) \mid \mathbf{W}_0, \mathbf{u}] \\
&\leq 16e^3 C_x^{3/2} B_{\phi'}^2 (1 + C_x^{3/2} B_{\phi'}^2) \left( \frac{\eta}{n} + \frac{\eta^2 t}{n^2} \right) \sum_{j=0}^t \mathbf{E}[\mathcal{L}_S(\mathbf{W}_j) \mid \mathbf{W}_0, \mathbf{u}]
\end{aligned}$$

as required.

### C.1 Proof of Lemma 3: From loss stability to parameter stability

Recall that  $\tilde{z}_i = (\tilde{\mathbf{x}}_i, y_i) \in \mathcal{B}_2^d(C_x) \times [-C_y, C_y]$ . Expanding the square loss and some basic algebra gives us:

$$\begin{aligned}
& 2 \left( \ell(\mathbf{W}_t, \tilde{z}_i) - \ell(\mathbf{W}_t^{(i)}, \tilde{z}_i) \right) \\
&= (f_{\mathbf{W}_t}(\tilde{\mathbf{x}}_i) - \tilde{y}_i)^2 - \left( f_{\mathbf{W}_t^{(i)}}(\tilde{\mathbf{x}}_i) - \tilde{y}_i \right)^2 \\
&= (f_{\mathbf{W}_t}(\tilde{\mathbf{x}}_i) - \tilde{y}_i) \left( f_{\mathbf{W}_t}(\tilde{\mathbf{x}}_i) - f_{\mathbf{W}_t^{(i)}}(\tilde{\mathbf{x}}_i) \right) + \left( f_{\mathbf{W}_t^{(i)}}(\tilde{\mathbf{x}}_i) - \tilde{y}_i \right) \left( f_{\mathbf{W}_t}(\tilde{\mathbf{x}}_i) - f_{\mathbf{W}_t^{(i)}}(\tilde{\mathbf{x}}_i) \right) \\
&= \left( f_{\mathbf{W}_t}(\tilde{\mathbf{x}}_i) - f_{\mathbf{W}_t^{(i)}}(\tilde{\mathbf{x}}_i) \right)^2 + 2 \left( f_{\mathbf{W}_t^{(i)}}(\tilde{\mathbf{x}}_i) - \tilde{y}_i \right) \left( f_{\mathbf{W}_t}(\tilde{\mathbf{x}}_i) - f_{\mathbf{W}_t^{(i)}}(\tilde{\mathbf{x}}_i) \right).
\end{aligned}$$

We then have

$$\begin{aligned}
& \frac{1}{n} \sum_{i=1}^n \mathbf{E} \left[ \ell(\mathbf{W}_t, \tilde{z}_i) - \ell(\mathbf{W}_t^{(i)}, \tilde{z}_i) \mid \mathbf{W}_0, \mathbf{u} \right] \\
&\leq \frac{1}{n} \sum_{i=1}^n \mathbf{E} \left[ \left| \left( f_{\mathbf{W}_t}(\tilde{\mathbf{x}}_i) - \tilde{y}_i \right) \right| \left| \left( f_{\mathbf{W}_t}(\tilde{\mathbf{x}}_i) - f_{\mathbf{W}_t^{(i)}}(\tilde{\mathbf{x}}_i) \right) \right| \mid \mathbf{W}_0, \mathbf{u} \right] \\
&\quad + \frac{1}{2n} \sum_{i=1}^n \mathbf{E} \left[ \left( f_{\mathbf{W}_t}(\tilde{\mathbf{x}}_i) - f_{\mathbf{W}_t^{(i)}}(\tilde{\mathbf{x}}_i) \right)^2 \mid \mathbf{W}_0, \mathbf{u} \right] \\
&\leq \sqrt{\frac{1}{n} \sum_{i=1}^n \mathbf{E} \left[ \left( f_{\mathbf{W}_t}(\tilde{\mathbf{x}}_i) - \tilde{y}_i \right)^2 \mid \mathbf{W}_0, \mathbf{u} \right]} \sqrt{\frac{1}{n} \sum_{i=1}^n \mathbf{E} \left[ \left( f_{\mathbf{W}_t}(\tilde{\mathbf{x}}_i) - f_{\mathbf{W}_t^{(i)}}(\tilde{\mathbf{x}}_i) \right)^2 \mid \mathbf{W}_0, \mathbf{u} \right]} \\
&\quad + \frac{1}{2n} \sum_{i=1}^n \mathbf{E} \left[ \left( f_{\mathbf{W}_t}(\tilde{\mathbf{x}}_i) - f_{\mathbf{W}_t^{(i)}}(\tilde{\mathbf{x}}_i) \right)^2 \mid \mathbf{W}_0, \mathbf{u} \right]
\end{aligned}$$

where performing steps as in Eq. (15)-(16) we have

$$\left( f_{\mathbf{W}_t}(\tilde{\mathbf{x}}_i) - f_{\mathbf{W}_t^{(i)}}(\tilde{\mathbf{x}}_i) \right)^2 \leq C_x^2 B_{\phi'}^2 \|\mathbf{W}_t - \mathbf{W}_t^{(i)}\|_2^2.$$

Plugging in this bound then yields the result.

## C.2 Proof of Lemma 4: Bound on on-average parameter stability

Throughout the proof empirical risk w.r.t. remove-one tuple  $S^{\setminus i}$  is denoted as

$$\mathcal{L}_{S^{\setminus i}}(\mathbf{W}) = \mathcal{L}_S(\mathbf{W}) - \frac{1}{n}\ell(\mathbf{W}, z_i) = \mathcal{L}_{S_i}(\mathbf{W}) - \frac{1}{n}\ell(\mathbf{W}, \tilde{z}_i).$$

Plugging in the gradient updates with the inequality  $(a+b)^2 \leq (1+p)a^2 + (1+1/p)b^2$  for  $p > 0$  then yields (this technique having been applied within [Lei and Ying, 2020])

$$\begin{aligned} \|\mathbf{W}_{t+1} - \mathbf{W}_{t+1}^{(i)}\|_2^2 &\leq (1+p) \underbrace{\|\mathbf{W}_t - \mathbf{W}_t^{(i)} - \eta \left( \nabla \mathcal{L}_{S^{\setminus i}}(\mathbf{W}_t) - \nabla \mathcal{L}_{S^{\setminus i}}(\mathbf{W}_t^{(i)}) \right)\|_2^2}_{\text{Expansiveness of the Gradient Update}} \\ &\quad + (1+1/p) \cdot \frac{2\eta^2}{n^2} \cdot \left( \|\nabla \ell(\mathbf{W}_t, z_i)\|_2^2 + \|\nabla \ell(\mathbf{W}_t^{(i)}, \tilde{z}_i)\|_2^2 \right). \end{aligned}$$

We must now bound the expansiveness of the gradient update. Opening-up the squared norm we get

$$\begin{aligned} &\|\mathbf{W}_t - \mathbf{W}_t^{(i)} - \eta(\nabla \mathcal{L}_{S^{\setminus i}}(\mathbf{W}_t) - \nabla \mathcal{L}_{S^{\setminus i}}(\mathbf{W}_t^{(i)}))\|_2^2 \\ &= \|\mathbf{W}_t - \mathbf{W}_t^{(i)}\|_2^2 + \eta^2 \|\nabla \mathcal{L}_{S^{\setminus i}}(\mathbf{W}_t) - \nabla \mathcal{L}_{S^{\setminus i}}(\mathbf{W}_t^{(i)})\|_2^2 \\ &\quad - 2\eta \left\langle \mathbf{W}_t - \mathbf{W}_t^{(i)}, \nabla \mathcal{L}_{S^{\setminus i}}(\mathbf{W}_t) - \nabla \mathcal{L}_{S^{\setminus i}}(\mathbf{W}_t^{(i)}) \right\rangle \end{aligned}$$

For this purpose we will use the following key lemma shown in Appendix C.3.1:

**Lemma 5** (Almost Co-coercivity of the Gradient Operator). *Consider the assumptions of Lemma 4. Then for  $t \geq 1$*

$$\begin{aligned} \left\langle \mathbf{W}_t - \mathbf{W}_t^{(i)}, \nabla \mathcal{L}_{S^{\setminus i}}(\mathbf{W}_t) - \nabla \mathcal{L}_{S^{\setminus i}}(\mathbf{W}_t^{(i)}) \right\rangle &\geq 2\eta \left( 1 - \frac{\eta\rho}{2} \right) \|\nabla \mathcal{L}_{S^{\setminus i}}(\mathbf{W}_t) - \nabla \mathcal{L}_{S^{\setminus i}}(\mathbf{W}_t^{(i)})\|_2^2 \\ &\quad - \epsilon \left\| \mathbf{W}_t - \mathbf{W}_t^{(i)} - \eta \left( \nabla \mathcal{L}_{S^{\setminus i}}(\mathbf{W}_t) - \nabla \mathcal{L}_{S^{\setminus i}}(\mathbf{W}_t^{(i)}) \right) \right\|_2^2 \end{aligned}$$

where

$$\begin{aligned} \rho &= C_x^2 \left( B_{\phi'}^2 + B_{\phi''} B_{\phi} + \frac{B_{\phi''} C_y}{\sqrt{m}} \right), \\ \epsilon &= 2 \cdot \frac{C_x^2 \sqrt{C_0} B_{\phi''}}{\sqrt{m}} \left( 4B_{\phi'} C_x \sqrt{\eta t} + \sqrt{2} \right). \end{aligned}$$

Thus by Lemma 5 we get

$$\begin{aligned} &\|\mathbf{W}_t - \mathbf{W}_t^{(i)} - \eta \left( \nabla \mathcal{L}_{S^{\setminus i}}(\mathbf{W}_t) - \nabla \mathcal{L}_{S^{\setminus i}}(\mathbf{W}_t^{(i)}) \right)\|_2^2 \\ &\leq \|\mathbf{W}_t - \mathbf{W}_t^{(i)}\|_2^2 + \eta^2 (2\eta\rho - 3) \left\| \nabla \mathcal{L}_{S^{\setminus i}}(\mathbf{W}_t) - \nabla \mathcal{L}_{S^{\setminus i}}(\mathbf{W}_t^{(i)}) \right\|_2^2 \\ &\quad + 2\eta\epsilon \left\| \mathbf{W}_t - \mathbf{W}_t^{(i)} - \eta \left( \nabla \mathcal{L}_{S^{\setminus i}}(\mathbf{W}_t) - \nabla \mathcal{L}_{S^{\setminus i}}(\mathbf{W}_t^{(i)}) \right) \right\|_2^2. \end{aligned}$$

Rearranging and using that  $\eta\rho \leq 1/2$  we then arrive at the recursion

$$\begin{aligned} \|\mathbf{W}_{t+1} - \mathbf{W}_{t+1}^{(i)}\|_F^2 &\leq \frac{1+p}{1-2\eta\epsilon} \cdot \|\mathbf{W}_t - \mathbf{W}_t^{(i)}\|_F^2 \\ &\quad + \left( 1 + \frac{1}{p} \right) \cdot \frac{2\eta^2}{n^2} \left( \|\nabla \ell(\mathbf{W}_t, z_i)\|_2^2 + \|\nabla \ell(\mathbf{W}_t^{(i)}, \tilde{z}_i)\|_2^2 \right) \\ &\leq \left( 1 + \frac{1}{p} \right) \cdot \frac{2\eta^2}{n^2} \left( \frac{1+p}{1-2\eta\epsilon} \right)^t \sum_{j=0}^t \left( \|\nabla \ell(\mathbf{W}_j, z_i)\|_2^2 + \|\nabla \ell(\mathbf{W}_j^{(i)}, \tilde{z}_i)\|_2^2 \right). \end{aligned}$$

Taking expectation and summing we then get

$$\begin{aligned} &\frac{1}{n} \sum_{i=1}^n \mathbf{E} \left[ \|\mathbf{W}_{t+1} - \mathbf{W}_{t+1}^{(i)}\|_F^2 \mid \mathbf{W}_0, \mathbf{u} \right] \\ &\leq 4(1+1/p) \frac{2\eta^2}{n^2} \left( \frac{1+p}{1-2\eta\epsilon} \right)^t \sum_{j=0}^t \mathbf{E} \left[ \|\nabla \ell(\mathbf{W}_j, z_i)\|_2^2 \mid \mathbf{W}_0, \mathbf{u} \right] \end{aligned}$$

where we note that  $\mathbf{E} [\|\nabla \ell(\mathbf{W}_j, z_i)\|_2^2 \mid \mathbf{W}_0, \mathbf{u}] = \mathbf{E} [\|\nabla \ell(\mathbf{W}_j^{(i)}, \tilde{z}_i)\|_2^2 \mid \mathbf{W}_0, \mathbf{u}]$  since  $z_i$  and  $\tilde{z}_i$  are identically distributed. Picking  $p = 1/t$  and noting that  $(1+p)^t = (1+1/t)^t \leq e$  yields the bound.

### C.3 Proof of Lemma 5: Almost-co-coercivity of the Gradient Operator

In this section we show Lemma 5 which says that a gradient operator of an overparameterised shallow network is almost-co-coercive. The proof of this lemma will require two auxiliary lemmas.

**Lemma 6.** *Consider Assumptions 1 and 2 and assume that  $\eta \leq 1/(2\rho)$ . Then for any  $t \geq 0$ ,  $i \in [n]$ ,*

$$\begin{aligned} \|\mathbf{W}_t - \mathbf{W}_0\|_F &\leq \sqrt{2\eta t \mathcal{L}_S(\mathbf{W}_0)}, \\ \|\mathbf{W}_t^{(i)} - \mathbf{W}_0\|_F &\leq \sqrt{2\eta t \mathcal{L}_{S \setminus i}(\mathbf{W}_0)}. \end{aligned}$$

*Proof.* The proof is given in Appendix C.3.2. □

We also need the following Lemma (whose proof is very similar to Lemma 1).

**Lemma 7.** *Consider Assumptions 1 and 2. Fix  $s \geq 0$ ,  $i \in [n]$ . For any  $\alpha \in [0, 1]$  denote*

$$\begin{aligned} \mathbf{W}(\alpha) &\stackrel{\text{def}}{=} \mathbf{W}_s^{(i)} + \alpha \left( \mathbf{W}_s - \mathbf{W}_s^{(i)} - \eta \left( \nabla \mathcal{L}_{S \setminus i}(\mathbf{W}_s) - \nabla \mathcal{L}_{S \setminus i}(\mathbf{W}_s^{(i)}) \right) \right), \\ \widetilde{\mathbf{W}}(\alpha) &\stackrel{\text{def}}{=} \mathbf{W}_s + \alpha \left( \mathbf{W}_s^{(i)} - \mathbf{W}_s - \eta \left( \nabla \mathcal{L}_{S \setminus i}(\mathbf{W}_s^{(i)}) - \nabla \mathcal{L}_{S \setminus i}(\mathbf{W}_s) \right) \right). \end{aligned}$$

*If  $\eta \leq 1/(2\rho)$ , then*

$$\begin{aligned} \min_{\alpha \in [0,1]} \lambda_{\min} \left( \nabla^2 \mathcal{L}_{S \setminus i}(\mathbf{W}(\alpha)) \right) &\geq -\tilde{\epsilon}, \\ \min_{\alpha \in [0,1]} \lambda_{\min} \left( \nabla^2 \mathcal{L}_{S \setminus i}(\widetilde{\mathbf{W}}(\alpha)) \right) &\geq -\tilde{\epsilon}. \end{aligned}$$

*with*

$$\tilde{\epsilon} = \frac{C_x^2 B_{\phi''}}{\sqrt{m}} \left( 4B_{\phi'} C \sqrt{\eta s} \left( \sqrt{\mathcal{L}_S(\mathbf{W}_0)} + \sqrt{\mathcal{L}_{S \setminus i}(\mathbf{W}_0)} \right) + \sqrt{2\mathcal{L}_{S \setminus i}(\mathbf{W}_0)} + \sqrt{2\mathcal{L}_S(\mathbf{W}_0)} \right).$$

*Proof.* The proof is given in Appendix C.3.3. □

#### C.3.1 Proof of Lemma 5

The proof of this Lemma follows by arguing that the operator  $\mathbf{w} \mapsto \nabla \mathcal{L}_{S \setminus i}(\mathbf{w})$  is almost-co-coercive: Recall that the operator  $F : \mathcal{X} \rightarrow \mathcal{X}$  is co-coercive whenever  $\langle \nabla F(\mathbf{x}) - \nabla F(\mathbf{y}), \mathbf{x} - \mathbf{y} \rangle \geq \alpha \|\nabla F(\mathbf{x}) - \nabla F(\mathbf{y})\|^2$  holds for any  $\mathbf{x}, \mathbf{y} \in \mathcal{X}$  with parameter  $\alpha > 0$ . In our case, right side of the inequality will be replaced by  $\alpha \|\nabla F(\mathbf{x}) - \nabla F(\mathbf{y})\|^2 - \epsilon$ , where  $\epsilon$  is a small.

Let us begin by defining the following two functions

$$\psi(\mathbf{W}) = \mathcal{L}_{S \setminus i}(\mathbf{W}) - \langle \nabla \mathcal{L}_{S \setminus i}(\mathbf{W}_t^{(i)}), \mathbf{W} \rangle, \quad \psi^*(\mathbf{W}) = \mathcal{L}_{S \setminus i}(\mathbf{W}) - \langle \nabla \mathcal{L}_{S \setminus i}(\mathbf{W}_t), \mathbf{W} \rangle.$$

Observe that

$$\begin{aligned} &\psi(\mathbf{W}_t) - \psi(\mathbf{W}_t^{(i)}) + \psi^*(\mathbf{W}_t^{(i)}) - \psi^*(\mathbf{W}_t) \\ &= \mathcal{L}_{S \setminus i}(\mathbf{W}_t) - \langle \nabla \mathcal{L}_{S \setminus i}(\mathbf{W}_t^{(i)}), \mathbf{W}_t \rangle - \mathcal{L}_{S \setminus i}(\mathbf{W}_t^{(i)}) + \langle \nabla \mathcal{L}_{S \setminus i}(\mathbf{W}_t^{(i)}), \mathbf{W}_t^{(i)} \rangle \\ &\quad + \mathcal{L}_{S \setminus i}(\mathbf{W}_t^{(i)}) - \langle \nabla \mathcal{L}_{S \setminus i}(\mathbf{W}_t), \mathbf{W}_t^{(i)} \rangle - \mathcal{L}_{S \setminus i}(\mathbf{W}_t) + \langle \nabla \mathcal{L}_{S \setminus i}(\mathbf{W}_t), \mathbf{W}_t \rangle \\ &= \langle \mathbf{W}_t - \mathbf{W}_t^{(i)}, \nabla \mathcal{L}_{S \setminus i}(\mathbf{W}_t) - \nabla \mathcal{L}_{S \setminus i}(\mathbf{W}_t^{(i)}) \rangle, \end{aligned} \tag{18}$$

from which follows that we are interesting in giving lower bounds on  $\psi(\mathbf{W}_t) - \psi(\mathbf{W}_t^{(i)})$  and  $\psi^*(\mathbf{W}_t^{(i)}) - \psi^*(\mathbf{W}_t)$ .

From Lemma 1 we know the loss is  $\rho$ -smooth with  $\rho = C_x^2 \left( B_{\phi'}^2 + B_{\phi''} B_\phi + \frac{C_y B_{\phi''}}{\sqrt{m}} \right)$ , and thus, for any  $i \in [n]$ , we immediately have the upper bounds

$$\psi(\mathbf{W}_t - \nabla\psi(\mathbf{W}_t)) \leq \psi(\mathbf{W}_t) - \eta \left( 1 - \frac{\eta\rho}{2} \right) \|\nabla\psi(\mathbf{W}_t)\|_2^2 \quad (19)$$

$$\psi^*(\mathbf{W}_t^{(i)} - \eta\nabla\psi^*(\mathbf{W}_t^{(i)})) \leq \psi^*(\mathbf{W}_t^{(i)}) - \eta \left( 1 - \frac{\eta\rho}{2} \right) \|\nabla\psi^*(\mathbf{W}_t^{(i)})\|_2^2 \quad (20)$$

Now, in the smooth and convex case [Nesterov, 2003], convexity would be used here to lower bound the left side of each of the inequalities by  $\psi(\mathbf{W}_t^{(i)})$  and  $\psi^*(\mathbf{W}_t)$  respectively. In our case, while the functions are not convex, we can get an ‘‘approximate’’ lower bound by leveraging that the minimum Eigenvalue evaluated at the points  $\mathbf{W}_t, \mathbf{W}_t^{(i)}$  is not too small. More precisely, we have the following lower bounds by applying Lemma 7, which will be shown shortly:

$$\psi(\mathbf{W}_t - \eta\nabla\psi(\mathbf{W}_t)) \geq \psi(\mathbf{W}_t^{(i)}) - \frac{\epsilon}{2} \|\mathbf{W}_t - \mathbf{W}_t^{(i)} - \eta\nabla\psi(\mathbf{W}_t)\|_2^2, \quad (21)$$

$$\psi^*(\mathbf{W}_t^{(i)} - \eta\nabla\psi^*(\mathbf{W}_t^{(i)})) \geq \psi^*(\mathbf{W}_t) - \frac{\epsilon}{2} \|\mathbf{W}_t^{(i)} - \mathbf{W}_t - \eta\nabla\psi^*(\mathbf{W}_t^{(i)})\|_2^2. \quad (22)$$

Combining this with Eq. (19), (20), and rearranging we get:

$$\psi(\mathbf{W}_t) - \psi(\mathbf{W}_t^{(i)}) \geq \eta \left( 1 - \frac{\eta\rho}{2} \right) \|\nabla\psi(\mathbf{W}_t)\|_2^2 - \frac{\epsilon}{2} \|\mathbf{W}_t - \mathbf{W}_t^{(i)} - \eta\nabla\psi(\mathbf{W}_t)\|_2^2, \quad (23)$$

$$\psi^*(\mathbf{W}_t^{(i)}) - \psi^*(\mathbf{W}_t) \geq \eta \left( 1 - \frac{\eta\rho}{2} \right) \|\nabla\psi^*(\mathbf{W}_t^{(i)})\|_2^2 - \frac{\epsilon}{2} \|\mathbf{W}_t^{(i)} - \mathbf{W}_t - \eta\nabla\psi^*(\mathbf{W}_t^{(i)})\|_2^2. \quad (24)$$

Adding together the two bounds and plugging into Eq. (18) completes the proof.

**Proof of Eq. (21) and Eq. (22).** All that is left to do, is to prove Eq. (21) and (22). To do that, we will use Lemma 7 while recalling the definition of  $\mathbf{W}(\alpha)$  and  $\widetilde{\mathbf{W}}(\alpha)$  given in the Lemma. That said, let us then define the following two functions:

$$g(\alpha) \stackrel{\text{def}}{=} \psi(\mathbf{W}(\alpha)) + \frac{\tilde{\epsilon}\alpha^2}{2} \|\mathbf{W}_t - \mathbf{W}_t^{(i)} - \eta(\nabla\mathcal{L}_{S^{\setminus i}}(\mathbf{W}_t) - \nabla\mathcal{L}_{S^{\setminus i}}(\mathbf{W}_t^{(i)}))\|_2^2,$$

$$\tilde{g}(\alpha) \stackrel{\text{def}}{=} \psi^*(\widetilde{\mathbf{W}}(\alpha)) + \frac{\tilde{\epsilon}\alpha^2}{2} \|\mathbf{W}_t - \mathbf{W}_t^{(i)} - \eta(\nabla\mathcal{L}_{S^{\setminus i}}(\mathbf{W}_t) - \nabla\mathcal{L}_{S^{\setminus i}}(\mathbf{W}_t^{(i)}))\|_2^2.$$

Note that from Lemma 7 we have that  $g''(\alpha), \tilde{g}''(\alpha) \geq 0$  for  $\alpha \in [0, 1]$ . Indeed, we have with  $\Delta \stackrel{\text{def}}{=} \mathbf{W}_t - \mathbf{W}_t^{(i)} - \eta(\nabla\mathcal{L}_{S^{\setminus i}}(\mathbf{W}_t) - \nabla\mathcal{L}_{S^{\setminus i}}(\mathbf{W}_t^{(i)}))$ :

$$g''(\alpha) = \langle \Delta, \nabla^2 \mathcal{L}_{S^{\setminus i}}(\mathbf{W}(\alpha)) \Delta \rangle + \tilde{\epsilon} \|\Delta\|_2^2 \geq 0$$

and similarly for  $\tilde{g}(\alpha)$ . Therefore both  $g(\cdot)$  and  $\tilde{g}(\cdot)$  are convex on  $[0, 1]$ . The first inequality then arises from noting the follow three points. Since  $g$  is convex we have  $g(1) - g(0) \geq g'(0)$  with  $g'(0) = \langle \nabla\psi(\mathbf{W}_t^{(i)}), \Delta \rangle = 0$  since  $\nabla\psi(\mathbf{W}_t^{(i)}) = 0$ . This yields

$$0 \leq g(1) - g(0)$$

$$= \psi(\mathbf{W}_t - \eta\nabla\psi(\mathbf{W}_t)) + \frac{\tilde{\epsilon}}{2} \|\mathbf{W}_t - \mathbf{W}_t^{(i)} - \eta(\nabla\mathcal{L}_{S^{\setminus i}}(\mathbf{W}_t) - \nabla\mathcal{L}_{S^{\setminus i}}(\mathbf{W}_t^{(i)}))\|_2^2 - \psi(\mathbf{W}_t^{(i)})$$

which is almost Eq. (21): The missing step is showing that  $\tilde{\epsilon} \leq \epsilon$ . This comes by the uniform boundedness of the loss, that is, having  $\ell(\mathbf{W}_0, z) \leq C_0$  a.s. we can upper-bound

$$\tilde{\epsilon} \leq 2 \cdot \frac{C_x^2 \sqrt{C_0} B_{\phi''}}{\sqrt{m}} (4B_{\phi'} C_x \sqrt{\eta s} + \sqrt{2}) = \epsilon$$

This proves Eq. (21), while Eq. (22) comes by following similar steps and considering  $\tilde{g}(1) - \tilde{g}(0) \geq \tilde{g}'(0)$ .

### C.3.2 Proof of Lemma 6

Recalling the Hessian (11) we have for any parameter  $\mathbf{W}$  and data point  $z = (\mathbf{x}, y)$ ,

$$\begin{aligned} \|\nabla^2 \ell(\mathbf{W}, z)\|_2 &\leq \|\nabla f_{\mathbf{W}}(\mathbf{x})\|_2^2 + \|\nabla^2 f_{\mathbf{W}}(\mathbf{x})\|_2 |f_{\mathbf{W}}(\mathbf{x}) - y| \\ &\leq C_x^2 \left( B_{\phi'}^2 + B_{\phi''} B_\phi + \frac{B_{\phi''} C_y}{\sqrt{m}} \right) \end{aligned}$$



That is we have from (12) the bound  $\|\nabla^2 f_{\mathbf{W}}(\mathbf{x})\|_2 \leq \frac{C_x^2}{\sqrt{m}} B_{\phi''}$ , meanwhile we can trivially bound

$$\begin{aligned} |f_{\mathbf{W}}(\mathbf{x}) - y| &\leq \frac{1}{\sqrt{m}} \sum_{j=1}^m |\phi(\langle (\mathbf{W})_j, \mathbf{x} \rangle)| + C_y \\ &\leq \sqrt{m} B_{\phi} + C_y. \end{aligned}$$

and

$$\begin{aligned} \|\nabla f_{\mathbf{W}}(\mathbf{x})\|_2^2 &= \|\mathbf{x}\|_2^2 \cdot \frac{1}{m} \sum_{j=1}^m \phi'(\langle (\mathbf{W})_j, \mathbf{x} \rangle) \\ &\leq C_x^2 B_{\phi'}^2. \end{aligned}$$

The loss is therefore  $\rho$ -smooth with  $\rho = C_x^2 \left( B_{\phi'}^2 + B_{\phi} B_{\phi''} + \frac{C_y B_{\phi''}}{\sqrt{m}} \right)$ . Following standard arguments we then have for  $j \in \mathbb{N}_0$

$$\mathcal{L}_S(\mathbf{W}_{j+1}) \leq \mathcal{L}_S(\mathbf{W}_j) - \eta \left( 1 - \frac{\eta\rho}{2} \right) \|\nabla \mathcal{L}_S(\mathbf{W}_j)\|_F^2$$

which when rearranged and summed over  $j$  yields

$$\eta \left( 1 - \frac{\eta\rho}{2} \right) \sum_{j=0}^t \|\nabla \mathcal{L}_S(\mathbf{W}_j)\|_F^2 \leq \sum_{j=0}^t \mathcal{L}_S(\mathbf{W}_j) - \mathcal{L}_S(\mathbf{W}_{j+1}) = \mathcal{L}_S(\mathbf{W}_0) - \mathcal{L}_S(\mathbf{W}_{t+1})$$

We also note that

$$\mathbf{W}_{t+1} - \mathbf{W}_0 = -\eta \sum_{s=0}^t \nabla \mathcal{L}_S(\mathbf{W}_s)$$

and therefore by convexity of the squared norm we have  $\|\mathbf{W}_{t+1} - \mathbf{W}_0\|_F^2 = \eta^2 \|\sum_{s=0}^t \nabla \mathcal{L}_S(\mathbf{W}_s)\|_F^2 \leq \eta^2 t \sum_{s=0}^t \|\nabla \mathcal{L}_S(\mathbf{W}_s)\|_F^2$ . Plugging this in we get when  $\eta\rho \leq 1/2$

$$\frac{3}{4} \cdot \frac{1}{\eta t} \|\mathbf{W}_{t+1} - \mathbf{W}_0\|_F^2 \leq \mathcal{L}_S(\mathbf{W}_0)$$

Rearranging then yields the inequality. An identical set of steps can be performed for the cases  $\mathbf{W}_t^{(i)}$  for  $i \in [n]$ .

### C.3.3 Proof of Lemma 7

Looking at (11) we note the first matrix is positive semi-definite and therefore for any  $\mathbf{W} \in \mathbb{R}^{dm}$ :

$$\begin{aligned} \lambda_{\min}(\nabla^2 \mathcal{L}_{S^{\setminus i}}(\mathbf{W})) &\geq -\lambda_{\max} \left( \frac{1}{n} \sum_{j \in [n]: j \neq i} \nabla^2 f_{\mathbf{W}}(\mathbf{x}_i) (f_{\mathbf{W}}(\mathbf{x}_j) - y_j) \right) \\ &\geq -\frac{C_x^2 B_{\phi''}}{\sqrt{m}} \cdot \frac{1}{n} \sum_{j \in [n]: j \neq i} |f_{\mathbf{W}}(\mathbf{x}_j) - y_j| \end{aligned}$$

where we have used the operator norm of the Hessian  $\|\nabla^2 f_{\mathbf{W}}(\mathbf{x})\|_2$  bound (12). We now choose  $\mathbf{W} = \mathbf{W}(\alpha)$  and thus need to bound  $\frac{1}{n} \sum_{j \in [n]: j \neq i} |f_{\mathbf{W}(\alpha)}(\mathbf{x}_j) - y_j|$  and  $\frac{1}{n} \sum_{j \in [n]: j \neq i} |f_{\widetilde{\mathbf{W}}(\alpha)}(\mathbf{x}_i) - y_j|$ . Note that we then have for any iterate  $\mathbf{W}_t$  with  $t \in \mathbb{N}_0$ ,

$$\begin{aligned} \frac{1}{n} \sum_{j \in [n]: j \neq i} |f_{\mathbf{W}(\alpha)}(\mathbf{x}_i) - y_j| &\leq \frac{1}{n} \sum_{j \in [n]: j \neq i} |f_{\mathbf{W}(\alpha)}(\mathbf{x}_i) - f_{\mathbf{W}_t^{(i)}}(\mathbf{x}_i)| + \frac{1}{n} \sum_{j \in [n]: j \neq i} |f_{\mathbf{W}_t^{(i)}}(\mathbf{x}_i) - y_j| \\ &\leq B_{\phi'} C_x \|\mathbf{W}(\alpha) - \mathbf{W}_t^{(i)}\|_F + \sqrt{2\mathcal{L}_{S^{\setminus i}}(\mathbf{W}_t^{(i)})} \end{aligned}$$

where the first term on the r.h.s. is bounded using Cauchy-Schwarz inequality as in Eq. (15)-(16), and the second term is bounded by Jensen's inequality. A similar calculation yields

$$\frac{1}{n} \sum_{j=1, j \neq i}^n |f_{\widetilde{\mathbf{W}}(\alpha)}(\mathbf{x}_i) - y_j| \leq B_{\phi'} C_x \|\widetilde{\mathbf{W}}(\alpha) - \mathbf{W}_t\|_F + \sqrt{2\mathcal{L}_{S^{\setminus i}}(\mathbf{W}_t^{(i)})}.$$

Since the loss is  $\rho$ -smooth by Lemma 1 we then have

$$\begin{aligned}\|\mathbf{W}(\alpha) - \mathbf{W}_t^{(i)}\|_F &\leq \alpha(\|\mathbf{W}_t - \mathbf{W}_t^{(i)}\|_F + \eta\|\nabla\mathcal{L}_{S^{\setminus i}}(\mathbf{W}_t) - \nabla\mathcal{L}_{S^{\setminus i}}(\mathbf{W}_t^{(i)})\|_F) \\ &\leq (1 + \eta\rho)\|\mathbf{W}_t - \mathbf{W}_t^{(i)}\|_F \\ &\leq \frac{3}{2}(\|\mathbf{W}_t - \mathbf{W}_0\|_F + \|\mathbf{W}_0 - \mathbf{W}_t^{(i)}\|_F) \\ &\leq \frac{3}{2}\sqrt{2\eta s}(\sqrt{\mathcal{L}_S(\mathbf{W}_0)} + \sqrt{\mathcal{L}_{S^{(i)}}(\mathbf{W}_0)})\end{aligned}$$

where at the end we used Lemma 6. A similar calculation yields the same bound for  $\|\widetilde{\mathbf{W}}(\alpha) - \mathbf{W}_t\|_F$ . Bringing together we get

$$\begin{aligned}\lambda_{\min}(\nabla^2\mathcal{L}_{S^{\setminus i}}(\mathbf{W}(\alpha))) &\geq -\frac{C_x^2 B_{\phi''}}{\sqrt{m}}\left(4B_{\phi'}C_x\sqrt{\eta s}(\sqrt{\mathcal{L}_S(\mathbf{W}_0)} + \sqrt{\mathcal{L}_{S^{(i)}}(\mathbf{W}_0)}) + \sqrt{2\mathcal{L}_{S^{\setminus i}}(\mathbf{W}_t^{(i)})}\right) \\ \lambda_{\min}(\nabla^2\mathcal{L}_{S^{\setminus i}}(\widetilde{\mathbf{W}}(\alpha))) &\geq -\frac{C_x^2 B_{\phi''}}{\sqrt{m}}\left(4B_{\phi'}C_x\sqrt{\eta s}(\sqrt{\mathcal{L}_S(\mathbf{W}_0)} + \sqrt{\mathcal{L}_{S^{(i)}}(\mathbf{W}_0)}) + \sqrt{2\mathcal{L}_{S^{\setminus i}}(\mathbf{W}_t)}\right)\end{aligned}$$

The final bound arises from noting that  $\mathcal{L}_{S^{\setminus i}}(\mathbf{W}_t) \leq \mathcal{L}_S(\mathbf{W}_t) \leq \mathcal{L}_S(\mathbf{W}_0)$  and  $\mathcal{L}_{S^{\setminus i}}(\mathbf{W}_t^{(i)}) \leq \mathcal{L}_{S^{(i)}}(\mathbf{W}_t^{(i)}) \leq \mathcal{L}_{S^{(i)}}(\mathbf{W}_0)$ .

## D Connection between $\Delta_S^{\text{oracle}}$ and NTK

This section is dedicated to the proof of Theorem 2. We will first need the following standard facts about the NTK.

**Lemma 8** (NTK Lemma). *For any  $\mathbf{W}, \widetilde{\mathbf{W}} \in \mathbb{R}^{d \times m}$  and any  $\mathbf{x} \in \mathbb{R}^d$ ,*

$$f_{\mathbf{W}}(\mathbf{x}) = f_{\widetilde{\mathbf{W}}}(\mathbf{x}) + \sum_{k=1}^m u_k \phi'(\langle \mathbf{x}, \widetilde{\mathbf{W}}_k \rangle) \langle \mathbf{W}_k - \widetilde{\mathbf{W}}_k, \mathbf{x} \rangle + \epsilon(\mathbf{x})$$

where

$$\epsilon(\mathbf{x}) = \frac{1}{2} \sum_{k=1}^m u_k \left( \int_0^1 \phi''(\tau \langle \mathbf{x}, \mathbf{W}_k \rangle + (1-\tau) \langle \mathbf{x}, \widetilde{\mathbf{W}}_k \rangle) d\tau \right) \langle \mathbf{x}, \mathbf{W}_k - \widetilde{\mathbf{W}}_k \rangle^2.$$

Note that

$$|\epsilon(\mathbf{x})| \leq \frac{B_{\phi''} \|\mathbf{x}\|}{2\sqrt{m}} \cdot \|\mathbf{W} - \widetilde{\mathbf{W}}\|_F^2.$$

*Proof.* By Taylor theorem,

$$\begin{aligned}f_{\mathbf{W}}(\mathbf{x}) &= f_{\widetilde{\mathbf{W}}}(\mathbf{x}) + \sum_k u_k \phi'(\langle \mathbf{x}, \widetilde{\mathbf{W}}_k \rangle) \langle \mathbf{x}, \mathbf{W}_k - \widetilde{\mathbf{W}}_k \rangle \\ &\quad + \underbrace{\frac{1}{2} \sum_k u_k \left( \int_0^1 \phi''(\tau \langle \mathbf{x}, \mathbf{W}_k \rangle + (1-\tau) \langle \mathbf{x}, \widetilde{\mathbf{W}}_k \rangle) d\tau \right) \langle \mathbf{x}, \mathbf{W}_k - \widetilde{\mathbf{W}}_k \rangle^2}_{\epsilon(\mathbf{x})}.\end{aligned}$$

Cauchy-Schwarz inequality gives us

$$|\epsilon(\mathbf{x})| \leq \frac{B_{\phi''} \|\mathbf{x}\|}{2\sqrt{m}} \cdot \|\mathbf{W} - \widetilde{\mathbf{W}}\|_F^2.$$

□

We will use the following proposition [Du et al., 2018, Arora et al., 2019]:

**Proposition 1** (Concentration of NTK gram matrix). *With probability at least  $1 - \delta$  over  $\mathbf{W}_0$ ,*

$$\|\hat{\mathbf{K}} - \mathbf{K}\|_2 \leq B_{\phi'} \sqrt{\frac{\ln(\frac{2n}{\delta})}{2m}}.$$

*Proof.* Since each entry is independent, by Hoeffding's inequality we have for any  $t \geq 0$ ,

$$\mathbf{P}\left(n|(\hat{\mathbf{K}})_{i,j} - (\mathbf{K})_{i,j}| \geq t\right) \leq 2e^{-2nt^2/B_{\phi'}^2},$$

and applying the union bound

$$\|\hat{\mathbf{K}} - \mathbf{K}\|_F^2 \leq \frac{B_{\phi'}^2 \ln(\frac{2n}{\delta})}{2m}.$$

□

Now we are ready to prove the main Theorem of this section (in the main text we only report the second result).

**Theorem 2 (restated).** *Denote*

$$\Phi_0 \stackrel{\text{def}}{=} \begin{bmatrix} u_1 \mathbf{X} \text{diag}(\phi'(\mathbf{X}^\top \mathbf{W}_{0,1})) \\ \vdots \\ u_m \mathbf{X} \text{diag}(\phi'(\mathbf{X}^\top \mathbf{W}_{0,m})) \end{bmatrix}$$

and  $\hat{\mathbf{K}} \stackrel{\text{def}}{=} \frac{1}{n} \Phi_0^\top \Phi_0$ . Assume that  $m \gtrsim (\eta T)^5$ . Then,

$$\Delta_S^{\text{oracle}} = \mathcal{O}\left(\frac{1}{\eta T} \langle \mathbf{y}, (n\hat{\mathbf{K}})^{-1} \mathbf{y} \rangle\right) \quad \text{as } \eta T \rightarrow \infty.$$

Consider Assumption 1 and that  $\eta T = n$ . Moreover, assume that entries of  $\mathbf{W}_0$  are i.i.d.,  $\mathbf{K} = \mathbf{E}[\hat{\mathbf{K}} | S, \mathbf{u}]$  with  $\lambda_{\min}(\mathbf{K}) \gtrsim 1/n$ , and assume that  $\mathbf{u} \sim \text{unif}(\{\pm 1/\sqrt{m}\})^m$  independently from all sources of randomness. Then, with probability least  $1 - \delta$  over  $(\mathbf{W}_0, \mathbf{u})$ ,

$$\Delta_S^{\text{oracle}} = \tilde{\mathcal{O}}_P\left(\frac{1}{n} \langle \mathbf{y}, (n\mathbf{K})^{-1} \mathbf{y} \rangle\right) \quad \text{as } n \rightarrow \infty.$$

*Proof.* The proof of the first inequality will follow by relaxation of the oracle R-ERM  $\Delta_S^{\text{oracle}}$  to the Moore-Penrose pseudo-inverse solution to a linearised problem given by Lemma 8. The proof of the second inequality will build on the same idea, in addition making use of the concentration of entries of  $\hat{\mathbf{K}}$  around  $\mathbf{K}$ .

Define

$$f_{\mathbf{W}}^{\text{lin}}(\mathbf{x}) \stackrel{\text{def}}{=} \sum_{k=1}^m u_k \phi'(\langle \mathbf{x}, \mathbf{W}_{0,k} \rangle) \langle \mathbf{W}_k - \mathbf{W}_{0,k}, \mathbf{x} \rangle,$$

$$\mathcal{L}_S^{\text{lin}}(\mathbf{W}) \stackrel{\text{def}}{=} \frac{1}{2} \sum_{i=1}^n (y_i - f_{\mathbf{W}}^{\text{lin}}(\mathbf{x}_i))^2.$$

Then for the square loss we have

$$\begin{aligned} (f_{\mathbf{W}}(\mathbf{x}_i) - y_i)^2 &= (f_{\mathbf{W}_0}(\mathbf{x}_i) + f_{\mathbf{W}}^{\text{lin}}(\mathbf{x}_i) + \epsilon(\mathbf{x}_i) - y_i)^2 \\ &\leq 2(f_{\mathbf{W}}^{\text{lin}}(\mathbf{x}_i) - (y_i - f_{\mathbf{W}_0}(\mathbf{x}_i)))^2 + 2\epsilon(\mathbf{x}_i)^2 \end{aligned}$$

and so,

$$\mathcal{L}(\mathbf{W}) \leq \mathcal{L}^{\text{lin}}(\mathbf{W}) + \frac{B_{\phi'}^2}{m} \cdot \|\mathbf{W} - \mathbf{W}_0\|_F^4$$

where we observe that

$$\mathcal{L}^{\text{lin}}(\mathbf{W}) = \frac{1}{n} \|\Phi_0^\top (\mathbf{W} - \mathbf{W}_0) - (\mathbf{y} - \hat{\mathbf{y}}_0)\|^2$$

and with  $\Phi_0$ , the matrix of NTK features, defined in the statement.

Solving the above undetermined least-squares problem using the Moore-Penrose pseudo-inverse we get

$$\mathbf{W}^{\text{pinv}} - \mathbf{W}_0 = (\Phi_0 \Phi_0^\top)^\dagger \Phi_0 (\mathbf{y} - \hat{\mathbf{y}}_0),$$

and so

$$\begin{aligned} \|\mathbf{W}^{\text{pinv}} - \mathbf{W}_0\|_F^2 &= (\mathbf{y} - \hat{\mathbf{y}}_0)^\top \Phi_0^\top (\Phi_0 \Phi_0^\top)^\dagger{}^2 \Phi_0 (\mathbf{y} - \hat{\mathbf{y}}_0) \\ &= (\mathbf{y} - \hat{\mathbf{y}}_0)^\top (\Phi_0^\top \Phi_0)^{-1} (\mathbf{y} - \hat{\mathbf{y}}_0) \\ &= (\mathbf{y} - \hat{\mathbf{y}}_0)^\top (n\hat{\mathbf{K}})^{-1} (\mathbf{y} - \hat{\mathbf{y}}_0) \end{aligned}$$

where the final step can be observed by Singular Value Decomposition (SVD) of  $\Phi_0$ . Since  $\mathcal{L}_S(\mathbf{W}^{\text{pinv}}) = 0$ ,

$$\Delta_S^{\text{oracle}} = \mathcal{O}\left(\frac{1}{\eta T} \left\langle (\mathbf{y} - \hat{\mathbf{y}}_0), (n\hat{\mathbf{K}})^{-1} (\mathbf{y} - \hat{\mathbf{y}}_0) \right\rangle\right) \quad \text{as } \eta T \rightarrow \infty.$$

This proves the first result.

Now we prove the second result involving  $\mathbf{K}$ . We will first handle the empirical risk by concentration between  $\hat{\mathbf{K}}$  and  $\mathbf{K}$ . For  $\alpha \in \mathbb{R}^n$  define  $\mathbf{W}_\alpha = \Phi_0 \alpha + \mathbf{W}_0$ . Then,

$$\begin{aligned} \mathcal{L}^{\text{lin}}(\mathbf{W}_\alpha) &= \frac{1}{n} \|\Phi_0^\top \Phi_0 \alpha - (\mathbf{y} - \hat{\mathbf{y}}_0)\|^2 \\ &= \frac{1}{n} \|n(\hat{\mathbf{K}} - \mathbf{K})\alpha + n\mathbf{K}\alpha - (\mathbf{y} - \hat{\mathbf{y}}_0)\|^2 \\ &\leq \frac{2}{n} \|n(\hat{\mathbf{K}} - \mathbf{K})\alpha\|^2 + \frac{2}{n} \|n\mathbf{K}\alpha - (\mathbf{y} - \hat{\mathbf{y}}_0)\|^2 \\ &\leq 2n \|\hat{\mathbf{K}} - \mathbf{K}\|_2^2 \|\alpha\|_2^2 + \frac{2}{n} \|n\mathbf{K}\alpha - (\mathbf{y} - \hat{\mathbf{y}}_0)\|^2 \end{aligned}$$

Plug into the above  $\hat{\alpha} = (n\mathbf{K})^{-1} (\mathbf{y} - \hat{\mathbf{y}}_0)$  (note that  $\mathbf{K}$  is full-rank by assumption)

$$\begin{aligned} \mathcal{L}^{\text{lin}}(\mathbf{W}_{\hat{\alpha}}) &\leq 2n \|\hat{\mathbf{K}} - \mathbf{K}\|_2^2 \|\hat{\alpha}\|_2^2 \\ &\leq n \cdot \frac{B_{\phi'}^2 \ln\left(\frac{2n}{\delta}\right)}{m} \cdot ((\mathbf{y} - \hat{\mathbf{y}}_0)^\top (n\mathbf{K})^{-2} (\mathbf{y} - \hat{\mathbf{y}}_0)) \\ &\leq \|\mathbf{y} - \hat{\mathbf{y}}_0\|^2 \cdot \frac{B_{\phi'}^2 \ln\left(\frac{2n}{\delta}\right)}{m} \cdot \frac{1}{n\lambda_{\min}(\mathbf{K})^2} \\ &= 2\mathcal{L}_S(\mathbf{W}_0) \cdot \frac{B_{\phi'}^2 \ln\left(\frac{2n}{\delta}\right)}{m} \cdot \frac{1}{\lambda_{\min}(\mathbf{K})^2} \end{aligned}$$

where the last inequality hold w.p. at least  $1 - \delta$  by Proposition 1.

Now we pay attention to the quadratic term within  $\Delta_S^{\text{oracle}}$ :

$$\begin{aligned} \|\mathbf{W}_{\hat{\alpha}} - \mathbf{W}_0\|_2^2 &= \|\Phi_0 \hat{\alpha}\|_2^2 \\ &= \|\Phi_0 (n\mathbf{K})^{-1} (\mathbf{y} - \hat{\mathbf{y}}_0)\|_2^2 \\ &= (\mathbf{y} - \hat{\mathbf{y}}_0)^\top (n\mathbf{K})^{-1} (n\hat{\mathbf{K}}) (n\mathbf{K})^{-1} (\mathbf{y} - \hat{\mathbf{y}}_0) \\ &= \underbrace{(\mathbf{y} - \hat{\mathbf{y}}_0)^\top (n\mathbf{K})^{-1} (n\hat{\mathbf{K}} - n\mathbf{K}) (n\mathbf{K})^{-1} (\mathbf{y} - \hat{\mathbf{y}}_0)}_{(i)} + \underbrace{(\mathbf{y} - \hat{\mathbf{y}}_0)^\top (n\mathbf{K})^{-1} (\mathbf{y} - \hat{\mathbf{y}}_0)}_{(ii)}. \end{aligned}$$

We will show that (i) is “small”:

$$\begin{aligned}
& (\mathbf{y} - \hat{\mathbf{y}}_0)^\top (n\mathbf{K})^{-1} (n\hat{\mathbf{K}} - n\mathbf{K}) (n\mathbf{K})^{-1} (\mathbf{y} - \hat{\mathbf{y}}_0) \\
& \leq \|\mathbf{y} - \hat{\mathbf{y}}_0\|^2 \|(n\mathbf{K})^{-2}\| n \|\hat{\mathbf{K}} - \mathbf{K}\|_2 \\
& \leq \|\mathbf{y} - \hat{\mathbf{y}}_0\|^2 \|(n\mathbf{K})^{-2}\| \cdot n B_{\phi'} \sqrt{\frac{\ln(\frac{2n}{\delta})}{2m}} \\
& \leq 2\mathcal{L}_S(\mathbf{W}_0) \cdot \frac{1}{\lambda_{\min}(\mathbf{K})^2} \cdot B_{\phi'} \sqrt{\frac{\ln(\frac{2n}{\delta})}{2m}}
\end{aligned}$$

where we used Proposition 1 once again. Putting all together w.p. at least  $1 - \delta$  over  $\mathbf{W}_0$  we have

$$\begin{aligned}
\Delta_S^{\text{oracle}} &= \mathcal{O}_P \left( \frac{1}{\eta T} \langle (\mathbf{y} - \hat{\mathbf{y}}_0), (n\mathbf{K})^{-1} (\mathbf{y} - \hat{\mathbf{y}}_0) \rangle \right. \\
&\quad \left. + \frac{2\mathcal{L}_S(\mathbf{W}_0)}{\lambda_{\min}(\mathbf{K})^2} \cdot \frac{B_{\phi'}^2 \ln(\frac{2n}{\delta})}{m} + \frac{1}{\eta T} \cdot \frac{2\mathcal{L}_S(\mathbf{W}_0)}{\lambda_{\min}(\mathbf{K})^2} \cdot B_{\phi'} \sqrt{\frac{\ln(\frac{2n}{\delta})}{2m}} \right) \quad \text{as } \eta T \rightarrow \infty.
\end{aligned}$$

Moreover, assuming that  $\lambda_{\min}(\mathbf{K}) \gtrsim 1/n$  and  $\eta T = n$ , the above turns into

$$\Delta_S^{\text{oracle}} = \tilde{\mathcal{O}}_P \left( \frac{1}{n} \langle (\mathbf{y} - \hat{\mathbf{y}}_0), (n\mathbf{K})^{-1} (\mathbf{y} - \hat{\mathbf{y}}_0) \rangle \right) \quad \text{as } n \rightarrow \infty.$$

The final bit is to note that

$$\langle \hat{\mathbf{y}}_0, (n\mathbf{K})^{-1} \hat{\mathbf{y}}_0 \rangle \leq \frac{\|\hat{\mathbf{y}}_0\|_2^2}{n\lambda_{\min}(\mathbf{K})} \lesssim \|\hat{\mathbf{y}}_0\|_2^2$$

can be bounded w.h.p. by randomising  $\mathbf{u} \sim \text{unif}(\{\pm 1/\sqrt{m}\})^m$ : For any  $i \in [n]$  and  $\delta \in (0, 1)$  by Hoeffding’s inequality we have:

$$\begin{aligned}
\mathbf{P} \left( f_{\mathbf{W}_0}(\mathbf{x}_i) \geq B_\phi \sqrt{\frac{\ln(\frac{1}{\delta})}{2}} \right) &\geq \mathbf{P} \left( f_{\mathbf{W}_0}(\mathbf{x}_i) \geq \sqrt{\frac{\ln(\frac{1}{\delta})}{2} \frac{1}{m} \sum_{k=1}^m \phi(\langle (\mathbf{W}_0)_k, \mathbf{x} \rangle)^2} \right) \\
&\geq 1 - \delta.
\end{aligned}$$

Taking a union bound over  $i \in [n]$  completes the proof of the second result.  $\square$

## E Additional Proofs

**Corollary 2 (restated).** *Assume the same as in Theorem 1 and Lemma 2. Then,*

$$\mathbf{E}[\mathcal{L}(\mathbf{W}_T) \mid \mathbf{W}_0, \mathbf{u}] \leq \left(1 + C \cdot \frac{\eta T}{n} \left(1 + \frac{\eta T}{n}\right)\right) \mathbf{E}[\Delta_S^{\text{oracle}} \mid \mathbf{W}_0, \mathbf{u}].$$

*Proof.* Considering Theorem 1 with  $t = T - 1$ , and noting that  $\mathcal{L}_S(\mathbf{W}_T) \leq \frac{1}{T} \sum_{j=0}^T \mathcal{L}_S(\mathbf{W}_j)$  then yields

$$\begin{aligned} \mathbf{E}[\mathcal{L}(\mathbf{W}_T) \mid \mathbf{W}_0, \mathbf{u}] &\leq \left(1 + b \left(\frac{\eta T}{n} + \frac{\eta^2 T^2}{n^2}\right)\right) \frac{1}{T} \sum_{j=0}^T \mathbf{E}[\mathcal{L}_S(\mathbf{W}_j) \mid \mathbf{W}_0, \mathbf{u}] \\ &\leq \left(1 + b \left(\frac{\eta T}{n} + \frac{\eta^2 T^2}{n^2}\right)\right) \\ &\quad \cdot \mathbf{E} \left[ \min_{\mathbf{W} \in \mathbb{R}^{d \times m}} \left\{ \mathcal{L}_S(\mathbf{W}) + \frac{\|\mathbf{W} - \mathbf{W}_0\|_F^2}{\eta t} + \frac{\tilde{b}}{\sqrt{m}} \cdot \frac{1}{T} \sum_{j=0}^T (1 \vee \|\mathbf{W} - \mathbf{W}_j\|_F)^3 \right\} \mid \mathbf{W}_0, \mathbf{u} \right] \end{aligned}$$

where at the end we applied Lemma 2 to bound  $\frac{1}{T} \sum_{j=0}^T \mathbf{E}[\mathcal{L}_S(\mathbf{W}_j) \mid \mathbf{W}_0]$ . The constants  $b, \tilde{b}$  are then defined in Theorem 1 and Lemma 2. Note from smoothness of the loss we have

$$\|\mathbf{W} - \mathbf{W}_j\|_F^3 \leq 2^{3/2} (\|\mathbf{W} - \mathbf{W}_0\|_F^3 + \|\mathbf{W}_0 - \mathbf{W}_j\|_F^3) \leq 2^{3/2} (\|\mathbf{W} - \mathbf{W}_0\|_F^3 + (\eta j C_0)^{3/2}),$$

in particular from the properties of gradient descent  $\|\mathbf{W}_0 - \mathbf{W}_j\|_F^2 \leq \eta j \mathcal{L}_S(\mathbf{W}_0)$  for  $j \in [T]$ . Plugging in then yields the final bound.  $\square$

## Checklist

1. For all authors...
  - (a) Do the main claims made in the abstract and introduction accurately reflect the paper’s contributions and scope? [Yes]
  - (b) Did you describe the limitations of your work? [Yes] These are summarised in Section 2.4.
  - (c) Did you discuss any potential negative societal impacts of your work? [N/A] We believe that presented research should be categorized as basic research and we are not targeting any specific application area. Theorems may inspire new algorithms and theoretical investigation. The algorithms presented here can be used for many different applications and a particular use may have both positive or negative impacts. We are not aware of any immediate short term negative implications of this research and we believe that a broader impact statement is not required for this paper.
  - (d) Have you read the ethics review guidelines and ensured that your paper conforms to them? [Yes]
2. If you are including theoretical results...
  - (a) Did you state the full set of assumptions of all theoretical results? [Yes] Assumptions are stated throughout Section 2 and in statements of theorems in Section 3.
  - (b) Did you include complete proofs of all theoretical results? [Yes] The main paper presents proof sketch in Section 3.2 while all the proofs with details are deferred to the supplementary material.
3. If you ran experiments...
  - (a) Did you include the code, data, and instructions needed to reproduce the main experimental results (either in the supplemental material or as a URL)? [Yes] Small synthetic experiment with instructions in Section 3.2.
  - (b) Did you specify all the training details (e.g., data splits, hyperparameters, how they were chosen)? [Yes]
  - (c) Did you report error bars (e.g., with respect to the random seed after running experiments multiple times)? [Yes]
  - (d) Did you include the total amount of compute and the type of resources used (e.g., type of GPUs, internal cluster, or cloud provider)? [No] We present a small synthetic experiment in Section 3.2 which can be run on any contemporary laptop.
4. If you are using existing assets (e.g., code, data, models) or curating/releasing new assets...
  - (a) If your work uses existing assets, did you cite the creators? [N/A]
  - (b) Did you mention the license of the assets? [N/A]
  - (c) Did you include any new assets either in the supplemental material or as a URL? [N/A]
  - (d) Did you discuss whether and how consent was obtained from people whose data you’re using/curating? [N/A]
  - (e) Did you discuss whether the data you are using/curating contains personally identifiable information or offensive content? [N/A]
5. If you used crowdsourcing or conducted research with human subjects...
  - (a) Did you include the full text of instructions given to participants and screenshots, if applicable? [N/A]
  - (b) Did you describe any potential participant risks, with links to Institutional Review Board (IRB) approvals, if applicable? [N/A]
  - (c) Did you include the estimated hourly wage paid to participants and the total amount spent on participant compensation? [N/A]
